# Supplementary material
Source: PubMed Central journal article supplement (PMC9058921)
Supplement: mmc1.pdf [file mmc1.pdf]

**Patterns, Volume 3**

**Supplemental information**

**Inferring global-scale temporal latent topics  
from news reports to predict public  
health interventions for COVID-19**

**Zhi Wen, Guido Powell, Imane Chafi, David L. Buckeridge, and Yue Li**

# S1 Experiment Details

The number of topics 25 is chosen based on the best topic quality, as shown in **Fig. S1**.

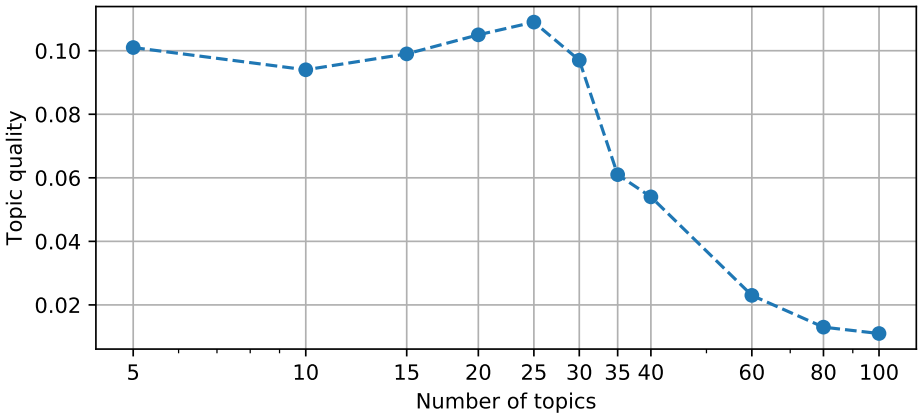

Figure S1: Topic quality versus the number of topics. Using 25 topics leads to the highest topic quality, and that number is used throughout this work. The x-axis is log-scaled.

# S2 Precision-Recall Curves of All NPIs

The precision-recall curves for the all NPIs are in **Fig. S2**.

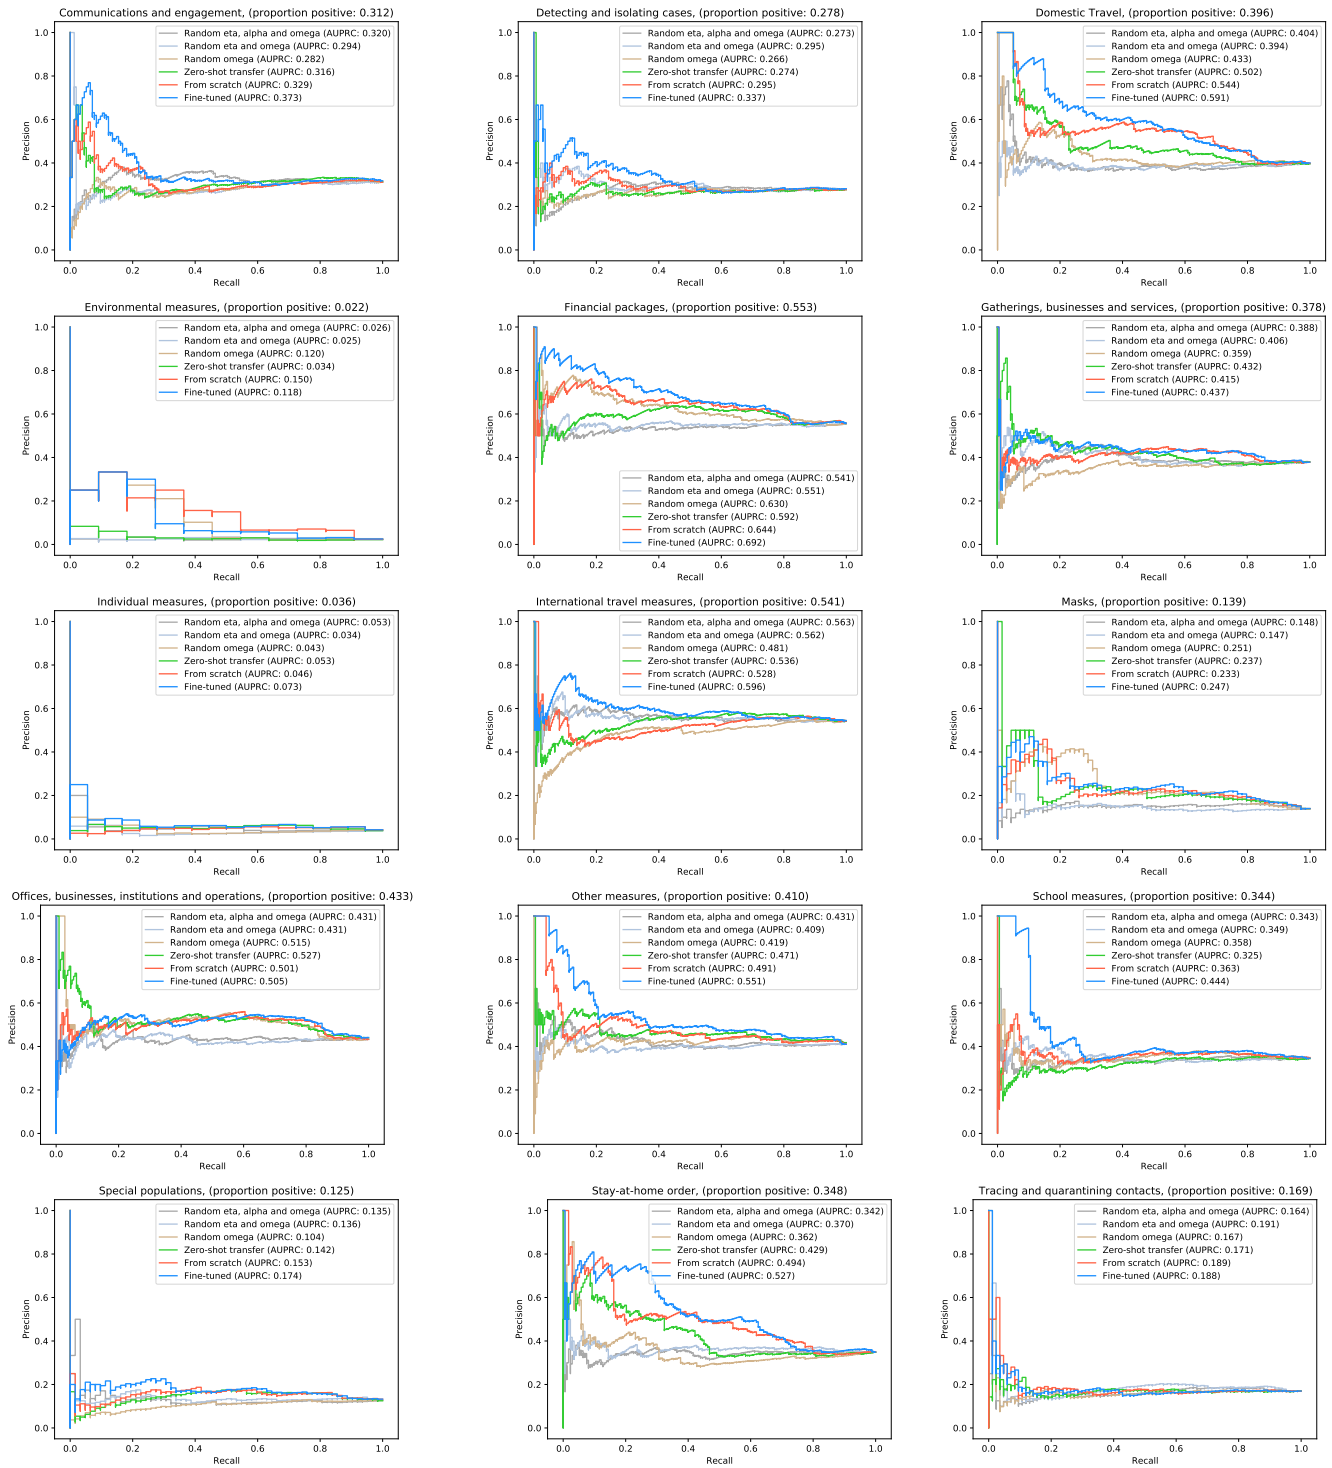

Figure S2: Country-level precision-recall curves of all 15 NPIs over 42 countries. Similar to **Fig. 6b** in the main text, each subfigure corresponds to one NPI, and together they correspond to all the NPIs in **Fig. 6a**. The predictions are made by a linear classifier on the country-specific topic mixture, and different methods in comparison learn the classifier weight differently as described in **Section 4.5** in the main text. In particular, Random, zero-shot transfer, from-scratch, and fine-tuned are methods that predict NPI using (proportion random features, pre-trained linear coefficients from Stage 2 on document-level NPI predictions, training the linear coefficients from random initialization, and fine-tuning the pre-trained linear coefficients from Stage 2, respectively). The numbers in the brackets indicate the proportion of the positive labels for that NPI, which are positively correlated with the corresponding AUPRC.

### S3 Dataset Details

The number of positive labels at the document-level in the WHO dataset and at the country-level are shown in **Fig. S4**.

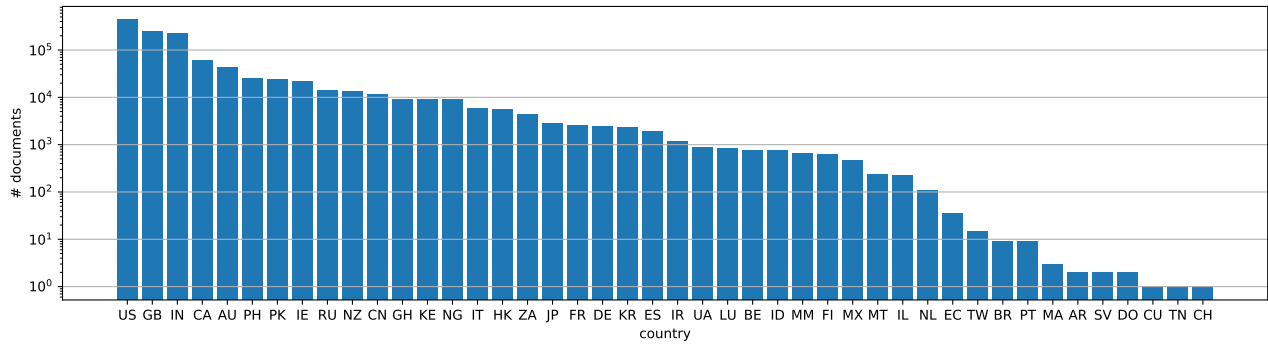

Figure S3: Number of documents of each country in the AYLIEN dataset. The y-axis is log-scaled.

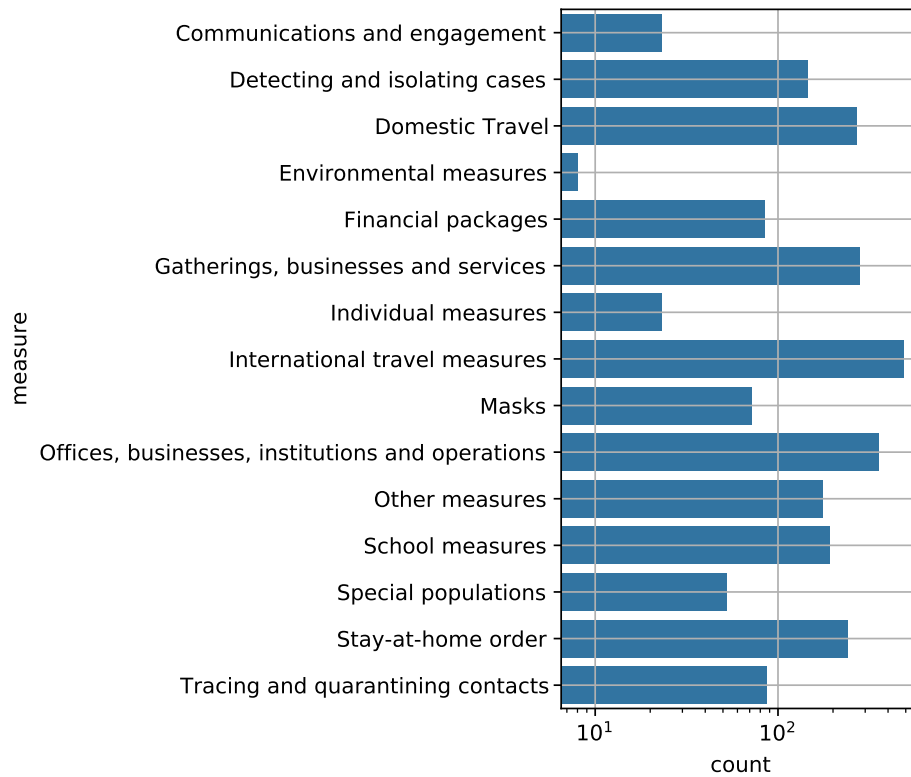

(a) WHO documents

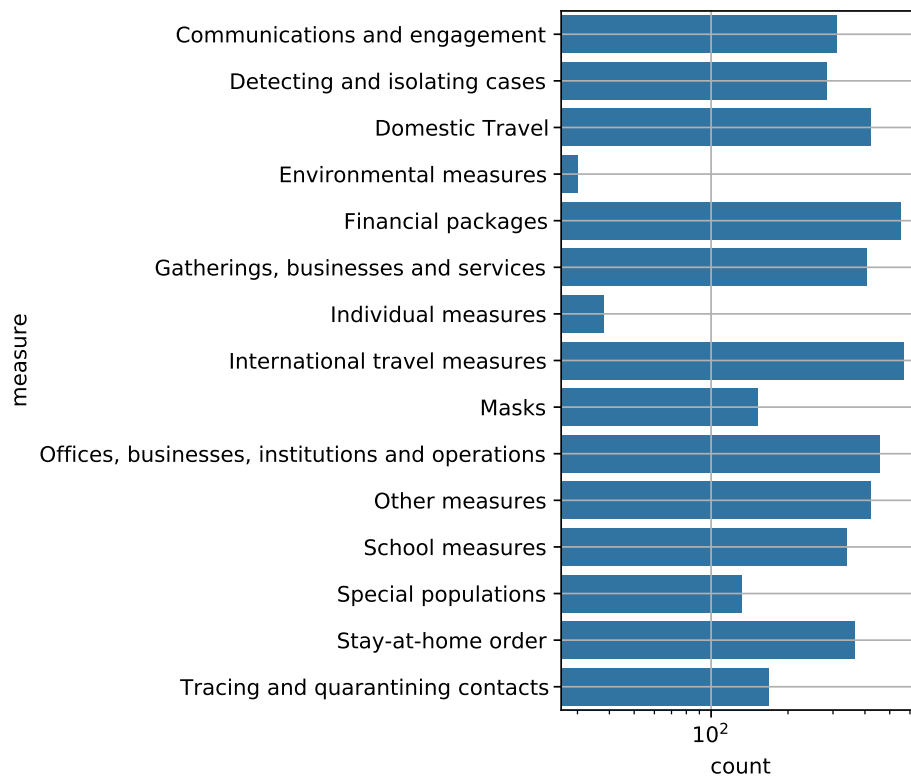

(b) Country-time pairs

Figure S4: The number of positive labels at the document and country levels. The x-axis is log-scaled.

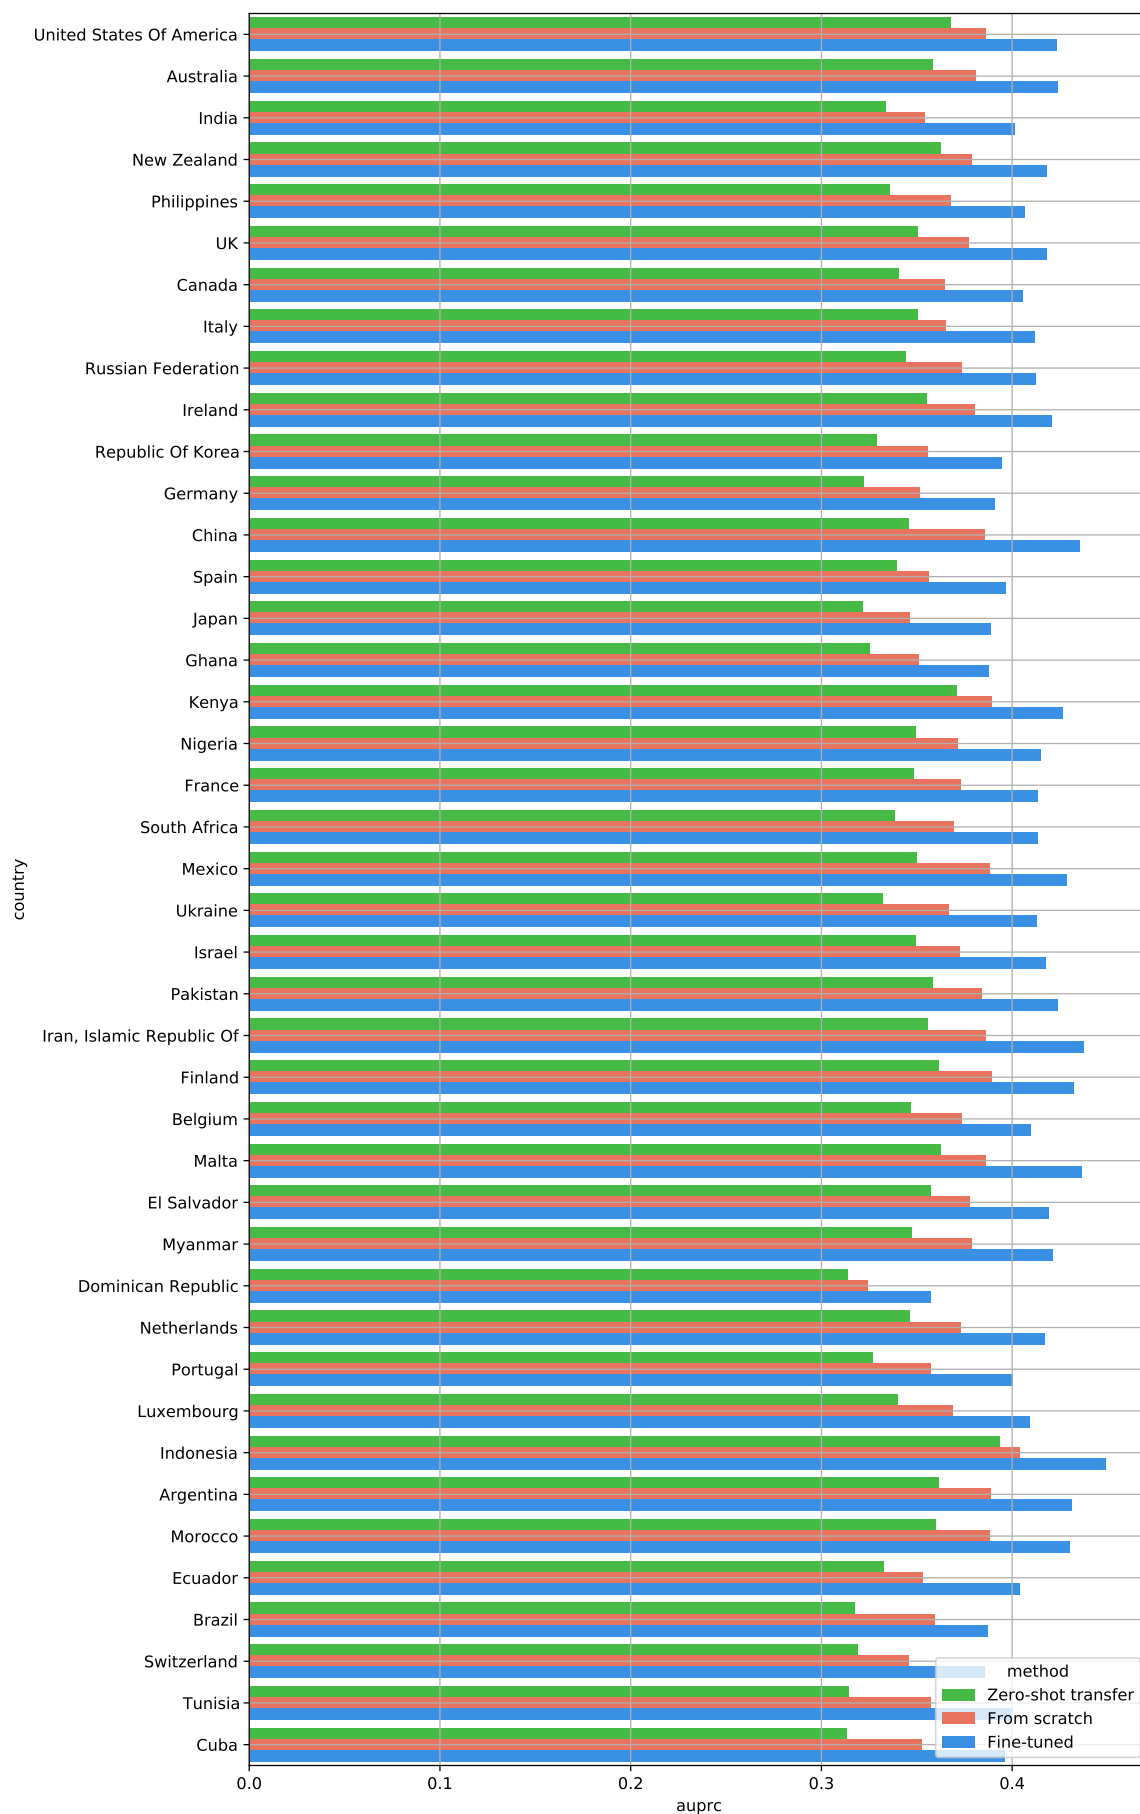

Figure S5: Performance of NPI prediction for each country in terms of macro AUPRC.

## **S4 Supplementary Tables**

Table S1: Grouping of WHO-NPI categories into 15 groups, which are treated as labels in our application of NPI predictions. Excel file named TableS1\_npi\_labels.xlsx is provided for this table.
